# Supplementary material for: Characterization of indigenous Durio species from Sarawak, Borneo: relationships between chemical composition and sensory attributes
Source: PeerJ. 2024 Aug 9;12:e17688. doi: 10.7717/peerj.17688 (PMC11318588; doi:10.7717/peerj.17688)
Supplement: Supplemental Information 1 [file peerj-12-17688-s001.xlsx]

## Sheet: Proximate
		Moisture content	Ash	Fiber	Fat	Protein	Carbohydrate
		(%)	(%)	(g)	(g)	(g)
D1	R1	53.5755	1.33	4.15	7.32	2.015	31.6095
D1	R2	54.0686	1.49	4.06	7	2.06	31.3214
D1	R3	56.22	1.41	4.11	7.36	2.04	28.86
D2	R1	54.92	1.32	4.13	7.14	2.01	30.48
D2	R2	58.08	1.81	3.99	8.06	2.03	26.03
D2	R3	52.86	1.8	4.01	7.69	2.05	31.59
D3	R1	55.23	1.75	4.71	6.24333	3.13	28.9367
D3	R2	56.08	1.66	4.7	5.99333	3.06	28.5067
D3	R3	60.1	1.81	4.68	6.14667	3.09	24.1733
D4	R1	54.91	1.31	3.64	6.68667	2.82	30.6333
D4	R2	62.35	1.39	3.555	6.67	2.775	23.26
D4	R3	58.85	1.34	3.625	6.19667	2.8	27.1883
D5	R1	46.0075	1.67	12.55	14.81	3.645	21.3175
D5	R2	47.8003	1.76	12.29	14.4167	3.555	20.178
D5	R3	46.9039	1.89	12.06	14.2833	3.445	21.4178
D6	R1	58.3498	1.49	3.705	2.46667	3.15	30.8385
D6	R2	58.4652	1.56	3.79	2.50333	3.105	30.5765
D6	R3	58.8684	1.52	3.745	2.58333	3.1	30.1832
D7	R1	69.88	1.84	3.75	5.53	3.44	15.56
D7	R2	67.15	2.06	3.88	5.83	3.86	17.22
D7	R3	70.46	2.22	3.91	5.64	3.31	14.46
D8	R1	65.7384	1.93	3.835	5.60667	3.635	19.2549
D8	R2	61.83	2.33	3.815	5.66	3.56	22.805
D8	R3	64.9901	2.12	3.74	5.32333	3.925	19.9015
D9	R1	63.2154	2.58	3.92	3.47667	3.725	23.0829
D9	R2	63.4857	2.76	3.84	3.37333	3.7	22.841
D9	R3	55.6042	2.65	3.885	3.28333	3.575	31.0024
