# Supplementary material for: Characterization of indigenous Durio species from Sarawak, Borneo: relationships between chemical composition and sensory attributes
Source: PeerJ. 2024 Aug 9;12:e17688. doi: 10.7717/peerj.17688 (PMC11318588; doi:10.7717/peerj.17688)
Supplement: Supplemental Information 2 [file peerj-12-17688-s002.xlsx]

## Sheet: Mineral
		Macro (mg/ 100g)					Micro (mg/ 100g)
		K	P	Ca	Mg	Na	Cu	Fe	Zn	Mn
D1	R1	896.5	509.975	10.76	71.5	31.885	0.125	2.385	1.33	0.68
D1	R2	897.5	512.05	10.695	71.5	31.855	0.1235	2.22	1.375	0.745
D1	R3	911.5	484.113	10.725	70.5	31.71	0.127	2.145	1.37	0.695
D2	R1	786	567.975	9.26	88	25.995	0.1085	2.93	1.425	0.51
D2	R2	783	567.975	9.06	78.5	31.005	0.1095	2.695	1.415	0.535
D2	R3	788	527.562	8.89	71.5	27.565	0.1095	2.905	1.465	0.495
D3	R1	1252	530.85	18.62	78.5	46.705	0.118	2.05	1.345	0.425
D3	R2	1261	531.975	18.905	79	51.51	0.114	2.175	1.33	0.375
D3	R3	1265.5	559.062	18.94	78.5	51.495	0.118	2.04	1.34	0.425
D4	R1	789.5	603.225	11.285	55.5	28.49	0.1045	2.53	1.675	0.54
D4	R2	793.5	603.475	11.175	55	23.605	0.1055	2.485	1.485	0.605
D4	R3	799	604.062	11.13	54.5	28.555	0.105	2.555	1.325	0.565
D5	R1	1005	608.975	6.32	40	22.5	0.144	2.3	1.31	0.35
D5	R2	1012.5	609.725	6.32	39.5	27.455	0.1455	2.275	1.325	0.34
D5	R3	1014.5	598.188	6.285	39.5	27.495	0.146	2.4	1.37	0.325
D6	R1	967	535.85	18.12	85	15.01	0.067	2.95	1.91	0.47
D6	R2	959.5	537.1	18.245	84.5	19.99	0.067	2.9	1.95	0.485
D6	R3	973.5	532.563	18.18	84.5	20.01	0.068	2.94	1.935	0.495
D7	R1	742	587.1	12.29	37.5	24.57	0.136	3.71	0.815	0.745
D7	R2	737.5	588.225	12.3	37.5	24.55	0.133	4.425	0.795	0.755
D7	R3	735	468.938	12.265	37	25.655	0.1335	3.56	0.79	0.805
D8	R1	1104	465.725	14.79	66.5	28.31	0.159	4.19	1.1	0.83
D8	R2	1109.5	474.75	15.15	66.5	23.39	0.1565	4.295	1.105	0.865
D8	R3	1122.5	582.812	14.94	66	23.355	0.157	4.15	1.13	0.825
D9	R1	1260.5	526.225	6.285	70.5	14.59	0.1185	1.815	0.9	0.98
D9	R2	1249.5	525.225	6.39	70.5	14.6	0.12	1.79	0.905	1.02
D9	R3	1260.5	520.563	6.39	70	14.625	0.121	1.8	0.87	0.955
