# Supplementary material for: Characterization of indigenous Durio species from Sarawak, Borneo: relationships between chemical composition and sensory attributes
Source: PeerJ. 2024 Aug 9;12:e17688. doi: 10.7717/peerj.17688 (PMC11318588; doi:10.7717/peerj.17688)
Supplement: Supplemental Information 3 [file peerj-12-17688-s003.xlsx]

## Sheet: Antioxidant
		Ascorbic.A	Carotenoid	TPC	TFC	FRAP	DPPH	ABTS
		mg/100g	µg/100g FW	mg GAE/100g	mg QE/100g	µM/g	EC50 (mg/ml)	EC50 (mg/ml)
D1	R1	41.8848	391.319	74.99	10.0685	1.69084	7.5221	12.2677
D1	R2	47.1204	400.193	67.17	18.87	1.70822	8.5545	12.2605
D1	R3	47.1204	417.052	75.285	12.4935	1.64229	8.7836	12.2058
D2	R1	44.6	378.248	66.88	8.1435	1.38459	9.6404	13.5538
D2	R2	47.15	385.018	67.085	10.6765	1.44712	9.5168	15.8707
D2	R3	46.22	390.095	69.875	7.304	1.28071	8.9654	14.7147
D3	R1	31.4136	981.173	46.564	6.882	1.38479	10.3964	9.6501
D3	R2	31.4136	979.475	40.151	2.4725	1.33285	9.7016	10.688
D3	R3	31.4136	968.441	46.579	10.5485	1.38599	11.1698	10.7246
D4	R1	36.6492	1640.38	29.1685	5.668	1.34584	7.5212	13.9564
D4	R2	41.8848	1643.06	31.583	7.394	1.31947	6.6259	13.6778
D4	R3	36.6492	1655.09	27.8515	5.14	1.34084	6.6475	14.1094
D5	R1	47.1204	2633.2	43.9265	11.7035	1.47729	7.3715	12.7096
D5	R2	31.4136	2615.12	42.046	10.192	1.45831	5.168	12.1351
D5	R3	41.8848	2633.2	56.315	11.8265	1.44472	7.1258	12.6986
D6	R1	52.47	1015.72	62.825	8.2065	2.10356	5.3151	10.4271
D6	R2	68.91	1011.57	71.355	10.3515	1.74617	4.4335	9.4131
D6	R3	63.31	1041.15	66.87	8.8755	1.91078	5.3408	9.4194
D7	R1	13.97	302.33	77.685	9.331	2.09157	8.0697	13.5485
D7	R2	10.54	292.032	73.9	9.9445	1.8942	9.431	13.5485
D7	R3	15.72	290.561	72.705	9.436	1.90439	8.2646	11.8794
D8	R1	15.7068	320.19	54.54	8.981	2.48711	9.8366	11.7557
D8	R2	15.7068	325.502	59.105	9.52	2.01766	9.5135	11.8452
D8	R3	10.4712	339.918	57.885	8.257	2.2394	8.6791	11.7677
D9	R1	10.55	322.685	50.93	6.084	1.36182	9.0943	6.5451
D9	R2	10.1	336.677	48.514	6.326	1.37101	4.3515	6.9151
D9	R3	10.77	335.802	45.668	6.0015	1.53722	8.7468	6.2677
